# Supplementary material for: Mycotoxin Co-Occurrence in Michigan Harvested Maize Grain
Source: MDPI journal article supplement (doi:10.3390/toxins14070431), 2022-06-24
Supplement: s1 [file s1]

## Article

# Mycotoxin Co-Occurrence in Michigan Harvested Maize Grain

Katlin Fusilier, Martin I. Chilvers, Victor Limay-Rios and Maninder P. Singh

**Table S1.** Positive detection rates for beauvericin (BEA), deoxynivalenol (DON), deoxynivalenol 3- $\beta$ -D-glucoside (D3G), 15-acetyl-deoxynivalenol (15-ADON), enniatin A (ENNA), enniatin B (ENNB), enniatin B1 (ENNB1), fumonisin B1 (FB1), fumonisin B2 (FB2), fumonisin B3 (FB3), Moniliformin (MON), T-2, and Zearalenone (ZEN) at all locations in 2017.

| Location  | DON                  | D3G | 15- |     | ZEN | FB1 | FB2 | FB3 | MON | ENNB | ENNB1 | ENNA | BEA | T2 |
|-----------|----------------------|-----|-----|-----|-----|-----|-----|-----|-----|------|-------|------|-----|----|
|           |                      |     | ADO | N   |     |     |     |     |     |      |       |      |     |    |
|           | -----% Positive----- |     |     |     |     |     |     |     |     |      |       |      |     |    |
| Allegan   | 100                  | 100 | 60  | 80  | 100 | 100 | 100 | 40  | 80  | 0    | 100   | 80   | 0   |    |
| Branch    | 100                  | 100 | 80  | 100 | 100 | 100 | 100 | 80  | 80  | 0    | 100   | 80   | 0   |    |
| Cass      | 100                  | 100 | 80  | 100 | 80  | 80  | 80  | 40  | 100 | 0    | 100   | 100  | 0   |    |
| Huron     | 60                   | 40  | 0   | 40  | 100 | 60  | 80  | 60  | 100 | 20   | 100   | 60   | 0   |    |
| Ingham    | 100                  | 100 | 80  | 100 | 100 | 100 | 100 | 80  | 60  | 0    | 100   | 100  | 0   |    |
| Mason     | 80                   | 60  | 20  | 40  | 60  | 60  | 80  | 60  | 100 | 0    | 100   | 100  | 40  |    |
| Montcalm  | 100                  | 100 | 80  | 80  | 60  | 60  | 60  | 0   | 100 | 20   | 100   | 60   | 40  |    |
| Saginaw   | 100                  | 20  | 0   | 40  | 60  | 60  | 60  | 40  | 80  | 0    | 100   | 60   | 20  |    |
| Washtenaw | 100                  | 100 | 100 | 100 | 100 | 100 | 40  | 60  | 80  | 0    | 100   | 100  | 0   |    |

**Table S2.** Positive detection rates for beauvericin (BEA), deoxynivalenol (DON), deoxynivalenol 3- $\beta$ -D-glucoside (D3G), 15-acetyl-deoxynivalenol (15-ADON), 3-acetyl-deoxynivalenol (3-ADON), enniatin A (ENNA), enniatin A1 (ENNA1), enniatin B (ENNB), enniatin B1 (ENNB1), fumonisin B1 (FB1), fumonisin B2 (FB2), fumonisin B3 (FB3), Moniliformin (MON), HT-2, T-2, and Zearalenone (ZEN) at all locations in 2018.

| Location  | DON                  | D3G | 15-<br>ADON | 3-<br>ADON | ZEN | FB1 | FB2 | FB3 | MON | ENNA | ENNA1 | ENNB | ENNB1 | BEA | HT2 | T2 |
|-----------|----------------------|-----|-------------|------------|-----|-----|-----|-----|-----|------|-------|------|-------|-----|-----|----|
|           | -----% Positive----- |     |             |            |     |     |     |     |     |      |       |      |       |     |     |    |
| Allegan   | 100                  | 100 | 100         | 0          | 100 | 100 | 60  | 60  | 60  | 0    | 0     | 0    | 0     | 100 | 0   | 20 |
| Branch    | 100                  | 100 | 100         | 0          | 100 | 100 | 100 | 100 | 60  | 0    | 20    | 60   | 20    | 100 | 0   | 20 |
| Cass      | 100                  | 100 | 100         | 80         | 100 | 100 | 100 | 100 | 100 | 0    | 0     | 40   | 20    | 100 | 0   | 20 |
| Huron     | 100                  | 100 | 100         | 100        | 100 | 100 | 100 | 100 | 100 | 20   | 0     | 0    | 0     | 100 | 60  | 60 |
| Ingham    | 100                  | 100 | 100         | 0          | 100 | 100 | 80  | 80  | 80  | 0    | 20    | 60   | 20    | 100 | 0   | 20 |
| Mason     | 100                  | 100 | 100         | 100        | 100 | 60  | 40  | 40  | 0   | 0    | 0     | 20   | 0     | 100 | 20  | 60 |
| Montcalm  | 100                  | 100 | 100         | 100        | 100 | 100 | 100 | 100 | 100 | 60   | 60    | 40   | 40    | 100 | 0   | 20 |
| Saginaw   | 100                  | 100 | 100         | 100        | 100 | 100 | 100 | 100 | 100 | 0    | 0     | 0    | 0     | 100 | 0   | 0  |
| Washtenaw | 100                  | 100 | 100         | 0          | 100 | 100 | 100 | 100 | 40  | 0    | 0     | 20   | 0     | 100 | 0   | 20 |

**Table S3.** Standard deviation of deoxynivalenol (DON), deoxynivalenol 3- $\beta$ -D-glucoside (D3G), HT-2 toxin (HT-2) and T-2 toxin (T-2) contamination levels at all locations in 2017, all other toxins tested did not vary by location. \* indicates locations under irrigation.

| Location  | Mycotoxin                         |       |       |       |
|-----------|-----------------------------------|-------|-------|-------|
|           | DON                               | D3G   | ZEN   | ENNA  |
|           | ----- $\mu\text{g kg}^{-1}$ ----- |       |       |       |
| Allegan   | 1690                              | 2340  | 661   | 0.016 |
| Branch*   | 1160                              | 13106 | 197   | 0.027 |
| Cass*     | 1600                              | 2200  | 192   | 0.010 |
| Huron     | 197                               | 168   | 0.668 | 0.007 |
| Ingham    | 264                               | 324   | 0.690 | 0.031 |
| Mason*    | 817                               | 616   | 247   | 0.034 |
| Montcalm  | 1070                              | 7262  | 85.2  | 0.026 |
| Saginaw   | 90.0                              | 115   | 4.73  | 0.028 |
| Washtenaw | 2720                              | 1660  | 935   | 0.014 |

**Table S4.** Standard deviation of deoxynivalenol (DON), deoxynivalenol 3- $\beta$ -D-glucoside (D3G), HT-2 toxin (HT-2) and T-2 toxin (T-2) contamination levels at all locations in 2018, all other toxins tested did not vary by location. \* indicates locations under irrigation.

| Location  | Mycotoxin                         |      |       |       |
|-----------|-----------------------------------|------|-------|-------|
|           | DON                               | D3G  | HT-2  | T-2   |
|           | ----- $\mu\text{g kg}^{-1}$ ----- |      |       |       |
| Allegan   | 1330                              | 418  | 0.169 | 0.379 |
| Branch*   | 1110                              | 142  | 0.619 | 1.38  |
| Cass*     | 1780                              | 117  | 0.166 | 0.371 |
| Huron     | 5720                              | 741  | 55.5  | 64.5  |
| Ingham    | 2990                              | 1200 | 0.221 | 0.495 |
| Mason*    | 1850                              | 1100 | 7.27  | 14.1  |
| Montcalm  | 6170                              | 659  | 0.314 | 0.702 |
| Saginaw   | 5150                              | 793  | 0     | 0     |
| Washtenaw | 1650                              | 163  | 0.289 | 0.647 |
